CORRECTION

# Correction: The Five-To-Six-Coordination Transition of Ferric Human Serum Heme-Albumin Is Allosterically-Modulated by Ibuprofen and Warfarin: A Combined XAS and MD Study

The *PLOS ONE* Staff

[Fig. 5](#) is incorrect. Please see the corrected [Fig. 5](#) here.

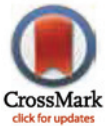

 OPEN ACCESS

**Citation:** The *PLOS ONE* Staff (2015) Correction: The Five-To-Six-Coordination Transition of Ferric Human Serum Heme-Albumin Is Allosterically-Modulated by Ibuprofen and Warfarin: A Combined XAS and MD Study. *PLoS ONE* 10(3): e0123144. doi:10.1371/journal.pone.0123144

**Published:** March 31, 2015

**Copyright:** © 2015 The PLOS ONE Staff. This is an open access article distributed under the terms of the [Creative Commons Attribution License](#), which permits unrestricted use, distribution, and reproduction in any medium, provided the original author and source are credited.

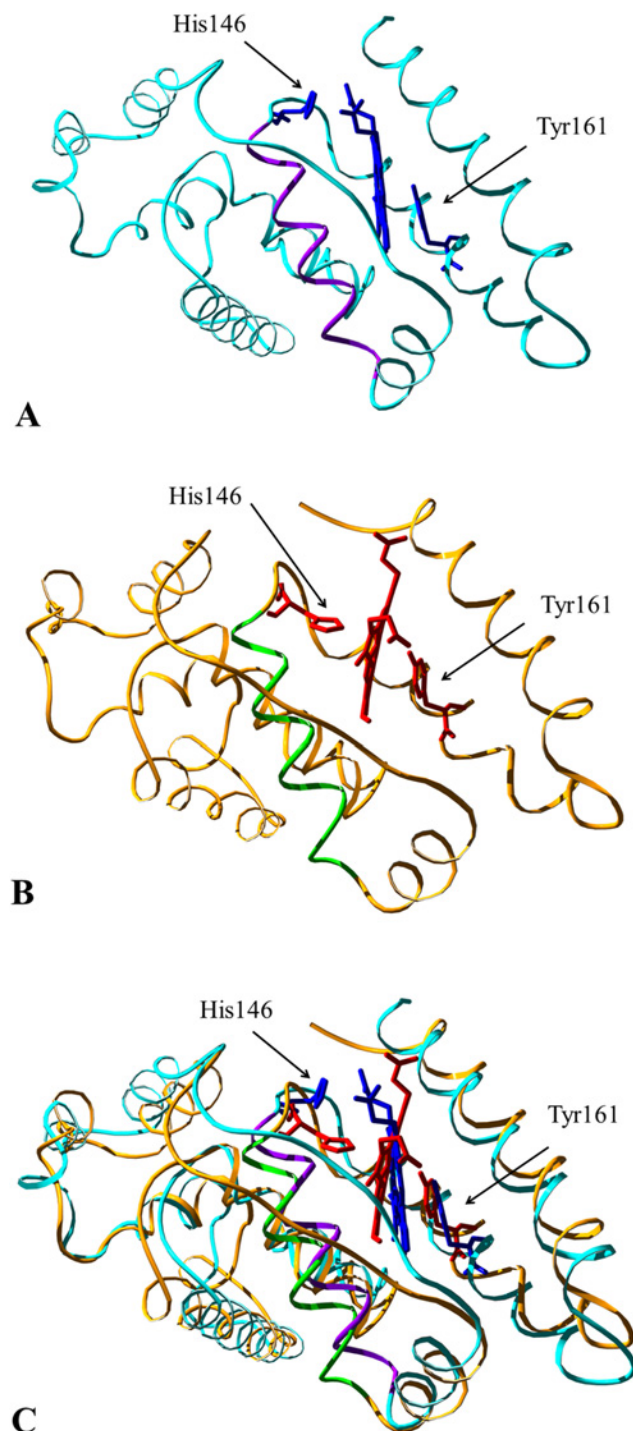

**Fig 5. Conformational transition of HSA-heme-Fe(III) upon ligand binding to the FA2 site.** Panel A. Three-dimensional representation of the starting crystal structure (cyan, PDB entry 1O9X [22]) of HSA-heme-Fe(III). Heme-Fe(III) and the His146 and Tyr161 residues are highlighted in blue. The Glu131-Arg145  $\alpha$ -helix is represented in magenta. Panel B. Three-dimensional representation of the final model (orange) of HSA-heme-Fe(III) obtained via SMDS. Heme-Fe(III) and the His146 and Tyr161 residues are highlighted in red. The Glu131-Arg145  $\alpha$ -helix is represented in green. Panel C. Superposition of the starting crystal structure and of the final model of HSA-heme-Fe(III). The picture has been drawn using the UCSF Chimera package [67], [68].

doi:10.1371/journal.pone.0123144.g001

## Reference

1. Meneghini C, Leboffe L, Bionducci M, Fanali G, Meli M, Colombo G, et al. (2014) The Five-To-Six-Coordination Transition of Ferric Human Serum Heme-Albumin Is Allosterically-Modulated by Ibuprofen and Warfarin: A Combined XAS and MD Study. PLoS ONE 9(8): e104231. doi: [10.1371/journal.pone.0104231](https://doi.org/10.1371/journal.pone.0104231) PMID: [25153171](https://pubmed.ncbi.nlm.nih.gov/25153171/)
